# Supplementary material for: Serum Levels of Myonectin Are Lower in Adults with Metabolic Syndrome and Are Negatively Correlated with Android Fat Mass
Source: MDPI journal article supplement (doi:10.3390/ijms24086874), 2023-04-07
Supplement: s1 [file s1]

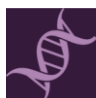

Article

# Serum Levels of Myonectin Are Lower in Adults with Metabolic Syndrome and Are Negatively Correlated with Android Fat Mass

Jorge L. Petro <sup>1,2,\*</sup>, María Carolina Fragozo-Ramos <sup>1</sup>, Andrés F. Milán <sup>1</sup>, Juan C. Aristizabal <sup>1</sup>,  
Jaime A. Gallo-Villegas <sup>3</sup>, Juan C. Calderón <sup>1,\*</sup>

<sup>1</sup> Physiology and Biochemistry Research Group—PHYSIS, Faculty of Medicine, University of Antioquia, Medellín 050010, Colombia

<sup>2</sup> Research Group in Physical Activity, Sports and Health Sciences—GICAFS, Universidad de Córdoba, Montería 230002, Colombia

<sup>3</sup> Sports Medicine Postgraduate Program, and GRINMADE Research Group, SICOR Center, Faculty of Medicine, University of Antioquia, Medellín 050010, Colombia

\*Correspondence: jorge.petro@udea.edu.co (J.L.P.); jcalderonv00@yahoo.com (J.C.C.)

## Supplementary Materials

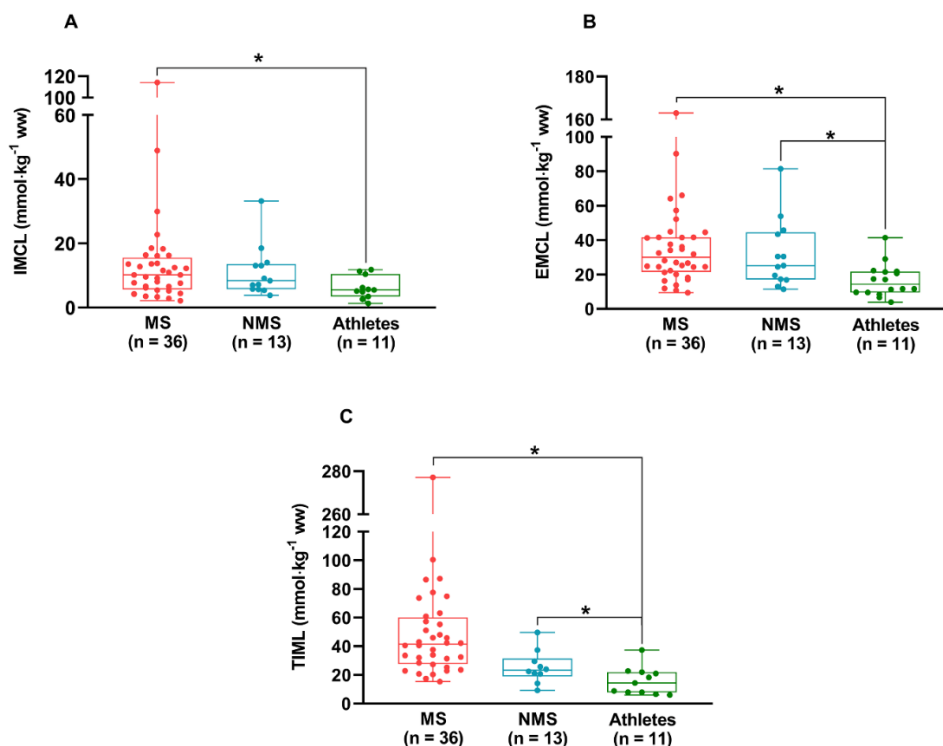

**Figure S1.** <sup>1</sup>H-MRS allows to demonstrate higher intramuscular lipid content in adults with metabolic risk compared with healthy controls. A. IMCL, Intramyocellular lipid content; B. EMCL, Extramyocellular lipid content; C. TIML, Total intramuscular lipid content (IMCL +

EMCL). Characteristics of the groups (mean±standard deviation or median (interquartile range): MS, metabolic syndrome (age: 51.0 (46.0–56.0) years, female sex: 70.1%, BMI: 30.6±4.0 kg·m<sup>-2</sup>); NMS, no metabolic syndrome (age: 53.0 (45.5–57.5) years, female: 72.4%, BMI: 27.0±3.5 kg·m<sup>-2</sup>); Athletes (age: 19.0±1.9 years, females: 81.8%, BMI: 24.6±2.1 kg·m<sup>-2</sup>); \*, statistically significant difference (P<0.05), comparisons between the groups made with the Kruskal-Wallis test. <sup>1</sup>H-MRS, proton nuclear magnetic resonance spectroscopy.

**Table S1.** Multiple linear regression model showing the relationship between myonectin and Android/gynoid fat mass ratio, excluding subjects who were treated with cholesterol medications.

|                                | $\beta^a$ | t      | P-value | 95% CI <sup>b</sup> | R <sup>2</sup> | adj. R <sup>2</sup> | P-value - F | D-W   |
|--------------------------------|-----------|--------|---------|---------------------|----------------|---------------------|-------------|-------|
| <b>And/Gyn</b>                 |           |        |         |                     |                |                     |             |       |
| Constant                       | 0.315     | 1.36   | 0.178   | -0.147 to 0.777     |                |                     |             |       |
| Myonectin, ng·mL <sup>-1</sup> | -0.010    | -2.242 | 0.028   | -0.019 to -0.001    |                |                     |             |       |
| Age, years                     | -0.300    | -5.142 | <0.001  | -0.416 to -0.184    | 0.532          | 0.501               | <0.001      | 2.113 |
| Female sex                     | 0.006     | 2.428  | 0.018   | 0.001 to 0.011      |                |                     |             |       |
| FMI, kg·m <sup>-2</sup>        | 0.018     | 2.641  | 0.010   | 0.004 to 0.031      |                |                     |             |       |
| LMI, kg·m <sup>-2</sup>        | 0.001     | 0.090  | 0.928   | -0.017 to 0.019     |                |                     |             |       |

The analysis was performed with n=80; <sup>a</sup> non-standardized coefficient (indicates the average change that corresponds to the dependent variable for each unit of change in the independent variable); <sup>b</sup> 95% confidence interval for  $\beta$ ; D-W, Durbin Watson test. And/Gyn, Android/gynoid fat mass ratio; FMI, fat mass index; LMI, lean mass index.
